# Supplementary material for: The Sustained Attention to Response Task Shows Lower Cingulo-Opercular and Frontoparietal Activity in People with Narcolepsy Type 1: An fMRI Study on the Neural Regulation of Attention
Source: PubMed Central journal article supplement (PMC7408461; doi:10.3390/brainsci10070419), 2020-07-01
Supplement: brainsci-10-00419-s001.pdf [file brainsci-10-00419-s001.pdf]

**Supplementary material 1 – Behavioral analyses**

**Table S1.** Behavioral performance.

| Difficulty Level | Timeframe    | Error Score Patients (%) |      |    | Error Score Controls (%) |      |    | p-value |
|------------------|--------------|--------------------------|------|----|--------------------------|------|----|---------|
|                  |              | Mean                     | SD   | N  | Mean                     | SD   | N  |         |
| Moderate         | Overall      | 4.43                     | 3.73 | 12 | 4.80                     | 2.41 | 11 | 0.784   |
|                  | Repetition 1 | 3.40                     | 4.01 | 12 | 3.70                     | 3.31 | 11 | -       |
|                  | Repetition 4 | 4.94                     | 4.56 | 12 | 7.07                     | 3.08 | 11 | -       |
|                  | Early half   | 3.77                     | 3.27 | 12 | 3.90                     | 2.63 | 11 | -       |
|                  | Late half    | 5.29                     | 5.13 | 12 | 5.77                     | 3.44 | 11 | -       |
| Higher           | Overall      | 7.20                     | 6.04 | 12 | 5.39                     | 2.02 | 11 | 0.347   |
|                  | Repetition 1 | 8.33                     | 8.07 | 12 | 6.76                     | 3.21 | 11 | -       |
|                  | Repetition 4 | 6.17                     | 5.55 | 12 | 4.71                     | 3.35 | 11 | -       |
|                  | Early half   | 5.95                     | 5.51 | 12 | 3.25                     | 2.23 | 11 | -       |
|                  | Late half    | 8.33                     | 6.37 | 12 | 7.69                     | 3.22 | 11 | -       |

  

| Difficulty Level | Timeframe    | Reaction Time Patients (Ms) |        |    | Reaction Time Controls (ms) |       |    | p-value |
|------------------|--------------|-----------------------------|--------|----|-----------------------------|-------|----|---------|
|                  |              | Mean                        | SD     | N  | Mean                        | SD    | N  |         |
| Moderate         | Overall      | 360.55                      | 78.18  | 12 | 313.19                      | 30.78 | 11 | 0.074   |
|                  | Repetition 1 | 362.36                      | 101.97 | 12 | 311.79                      | 27.51 | 11 | -       |
|                  | Repetition 4 | 363.96                      | 78.70  | 12 | 317.29                      | 44.07 | 11 | -       |
|                  | Early half   | 356.89                      | 76.11  | 12 | 315.02                      | 25.89 | 11 | -       |
|                  | Late half    | 364.87                      | 81.56  | 12 | 311.00                      | 38.68 | 11 | -       |
| Higher           | Overall      | 362.53                      | 75.79  | 12 | 311.06                      | 33.59 | 11 | 0.049   |
|                  | Repetition 1 | 360.78                      | 93.35  | 12 | 300.50                      | 32.01 | 11 | -       |
|                  | Repetition 4 | 361.06                      | 81.24  | 12 | 315.21                      | 55.39 | 11 | -       |
|                  | Early half   | 368.99                      | 87.33  | 12 | 312.80                      | 33.02 | 11 | -       |
|                  | Late half    | 354.74                      | 78.99  | 12 | 308.55                      | 36.26 | 11 | -       |

**Supplementary S2.** Behavioral change from moderate to higher difficulty level.

| Group    | Outcome Measure    | Moderate Difficulty |       | Higher Difficulty |       | p-value |
|----------|--------------------|---------------------|-------|-------------------|-------|---------|
|          |                    | Mean                | SD    | Mean              | SD    |         |
| Patients | Error score (%)    | 4.43                | 3.73  | 7.20              | 6.04  | 0.011   |
|          | Reaction time (ms) | 360.55              | 78.18 | 362.53            | 75.79 | 0.834   |
| Controls | Error score (%)    | 4.80                | 2.41  | 5.39              | 2.02  | 0.365   |
|          | Reaction time (ms) | 313.19              | 30.78 | 311.06            | 33.59 | 0.361   |

**Supplementary S3.** Overall behavioral analyses.

| Outcome Measure | Source                   | Sum Of Squares | Df <sub>1</sub> | Df <sub>2</sub> | Mean Square | F    | p-value | $\eta_p^2$ |
|-----------------|--------------------------|----------------|-----------------|-----------------|-------------|------|---------|------------|
| Error score     | Difficulty level         | 32.42          | 1               | 21              | 32.42       | 9.04 | 0.007   | 0.30       |
|                 | Group                    | 5.89           | 1               | 21              | 5.89        | 0.21 | 0.648   | 0.01       |
|                 | Difficulty level x Group | 13.50          | 1               | 21              | 13.50       | 3.77 | 0.066   | 0.15       |
| Reaction time   | Difficulty level         | 0.06           | 1               | 21              | 0.06        | 0.00 | 0.988   | 0.00       |
|                 | Group                    | 28033.39       | 1               | 21              | 28033.39    | 4.05 | 0.057   | 0.16       |
|                 | Difficulty level x Group | 48.37          | 1               | 21              | 48.37       | 0.17 | 0.682   | 0.01       |

**Supplementary S4.** Behavioral time-on-task over repetitions analyses.

| Difficulty Level | Outcome Measure | Source                    | Sum Of Squares | Df <sub>1</sub> | Df <sub>2</sub> | Mean Square | F     | p-value | $\eta_p^2$ |
|------------------|-----------------|---------------------------|----------------|-----------------|-----------------|-------------|-------|---------|------------|
| Moderate         | Error score     | Repetition number         | 69.18          | 1               | 21              | 69.18       | 11.88 | 0.002   | 0.36       |
|                  |                 | Group                     | 17.10          | 1               | 21              | 17.10       | 0.74  | 0.401   | 0.03       |
|                  | Reaction time   | Repetition number x Group | 9.54           | 1               | 21              | 9.54        | 1.64  | 0.214   | 0.07       |
|                  |                 | Repetition number         | 144.54         | 1               | 21              | 144.54      | 0.13  | 0.724   | 0.01       |
|                  |                 | Group                     | 27126.41       | 1               | 21              | 27126.41    | 3.07  | 0.095   | 0.13       |
|                  |                 | Repetition number x Group | 43.59          | 1               | 21              | 43.59       | 0.04  | 0.846   | 0.00       |
| Higher           | Error score     | Repetition number         | 50.80          | 1               | 21              | 50.80       | 3.27  | 0.085   | 0.14       |
|                  |                 | Group                     | 26.37          | 1               | 21              | 26.37       | 0.59  | 0.452   | 0.03       |
|                  |                 | Repetition number x Group | 0.04           | 1               | 21              | 0.04        | 0.00  | 0.962   | 0.00       |

|               |                              |          |   |    |          |      |       |      |
|---------------|------------------------------|----------|---|----|----------|------|-------|------|
| Reaction time | Repetition number            | 644.62   | 1 | 21 | 644.62   | 0.36 | 0.556 | 0.02 |
|               | Group                        | 32320.55 | 1 | 21 | 32320.55 | 3.96 | 0.060 | 0.16 |
|               | Repetition number<br>x Group | 597.08   | 1 | 21 | 597.08   | 0.33 | 0.571 | 0.02 |

**Supplementary S5. Behavioral time-on-task within blocks analyses.**

| Difficulty Level | Outcome Measure | Source             | Sum Of Squares | df <sub>1</sub> | df <sub>2</sub> | Mean square | F     | p-value | $\eta^2$ |
|------------------|-----------------|--------------------|----------------|-----------------|-----------------|-------------|-------|---------|----------|
| Moderate         | Error score     | Block half         | 33.03          | 1               | 21              | 33.03       | 4.98  | 0.037   | 0.19     |
|                  |                 | Group              | 1.07           | 1               | 21              | 1.07        | 0.05  | 0.826   | 0.00     |
|                  |                 | Block half x Group | 0.36           | 1               | 21              | 0.36        | 0.05  | 0.818   | 0.00     |
|                  | Reaction time   | Block half         | 45.28          | 1               | 21              | 45.28       | 0.13  | 0.723   | 0.01     |
|                  |                 | Group              | 26301.90       | 1               | 21              | 26301.90    | 3.65  | 0.070   | 0.15     |
|                  |                 | Block half x Group | 413.18         | 1               | 21              | 413.18      | 1.18  | 0.290   | 0.05     |
| Higher           | Error score     | Block half         | 133.79         | 1               | 21              | 133.79      | 25.37 | <0.001  | 0.55     |
|                  |                 | Group              | 32.12          | 1               | 21              | 32.12       | 0.82  | 0.375   | 0.04     |
|                  |                 | Block half x Group | 12.23          | 1               | 21              | 12.23       | 2.32  | 0.143   | 0.10     |
|                  | Reaction time   | Block half         | 982.51         | 1               | 21              | 982.51      | 0.74  | 0.400   | 0.03     |
|                  |                 | Group              | 30076.31       | 1               | 21              | 30076.31    | 4.25  | 0.052   | 0.17     |
|                  |                 | Block half x Group | 287.70         | 1               | 21              | 287.70      | 0.22  | 0.647   | 0.01     |
